# Supplementary material for: Mediating Effects of Diagnostic Route on the Comorbidity Gap in Survival of Patients with Diffuse Large B-Cell or Follicular Lymphoma in England
Source: MDPI journal article supplement (doi:10.3390/cancers14205082), 2022-10-17
Supplement: s1 [file s1]

**Supplementary Table S1:** Comorbidities and their diagnostic ICD-10 codes

| Comorbidity                           | ICD-10                                                                                                                                                                             |
|---------------------------------------|------------------------------------------------------------------------------------------------------------------------------------------------------------------------------------|
| Myocardial infarction                 | I21.x, I22.x, I25.2                                                                                                                                                                |
| Congestive cardiac failure            | I11.0, I13.0, I13.2, I25.5, I42.0, I42.5–I42.9, I43.x, I50.x, P29.0                                                                                                                |
| Peripheral vascular disease           | I70.x, I71.x, I73.1, I73.8, I73.9, I77.1, I79.0, I79.2, K55.1, K55.8, K55.9, Z95.8, Z95.9                                                                                          |
| Cerebrovascular disease               | G45.x, G46.x, H34.0, I60.x–I69.x                                                                                                                                                   |
| Dementia                              | F00.x–F03.x, F05.1, G30.x, G31.1                                                                                                                                                   |
| Chronic obstructive pulmonary disease | I27.9, J40.x–J47.x, J60.x–J67.x, J68.4, J70.1, J70.3                                                                                                                               |
| Rheumatological disease               | M05.x, M06.x, M31.5, M32.x–M34.x, M35.1, M35.3, M36.0                                                                                                                              |
| Liver disease                         | B18.x, K70.0–K70.3, K70.9, K71.3–K71.5, K71.7, K73.x, K74.x, K76.0, K76.2–K76.4, K76.8, K76.9, Z94.4, K71.1, K72.1, K72.9, K76.5, K76.6, K76.7, I85.0, I85.9, I86.4, I98.2, K70.4, |
| Diabetes mellitus                     | E10.0 – E14                                                                                                                                                                        |

|                          |                                                                                        |
|--------------------------|----------------------------------------------------------------------------------------|
| Hemiplegia or paraplegia | G04.1, G11.4, G80.1, G80.2, G81.x, G82.x, G83.0–G83.4, G83.9                           |
| Renal disease            | I12.0, I13.1, N03.2–N03.7, N05.2–N05.7, N18.x, N19.x, N25.0, Z49.0–Z49.2, Z94.0, Z99.2 |
| AIDS/HIV                 | B20.x–B22.x, B24.x                                                                     |

---

ICD-10: International Classification of Diseases, 10<sup>th</sup> Revision

Diabetes with/without chronic complication is combined within the RCS Charlson Comorbidity Score

**Supplementary Table S2.** Distribution of non-Hodgkin lymphoma subtypes for patients diagnosed from 2005-2013, with respective morphology and topography ICD-O-3 codes.

| Index | Site group (subtype)          | Progression | Topography  | Morphology                   | n      | %        |
|-------|-------------------------------|-------------|-------------|------------------------------|--------|----------|
| 1     | CLL/SLL*                      | Indolent    | C80.0-C85.9 | 9670, 9823                   | 4,043  | 4.78     |
| 2     | Waldenstrom macroglobulinemia | Indolent    | C80.0-C85.9 | 9761                         | 2,453  | 2.90     |
| 3     | Mantle cell                   | Indolent    | C80.0-C85.9 | 9673                         | 3,549  | 4.20     |
| 4     | Diffuse large B-cell          | Aggressive  | C80.0-C85.9 | 9680, 9688, 9737-9738        | 30,750 | 36.39    |
| 5     | Burkitt                       | Aggressive  | C80.0-C85.9 | 9687, 9826                   | 1,077  | 1.27     |
| 6     | Follicular                    | Indolent    | C80.0-C85.9 | 9690-9691, 9695, 9698        | 15,624 | 18.49    |
| 7     | Mature T-cell                 | Aggressive  | C80.0-C85.9 | 9702                         | 6,066  | 7.18     |
| 8     | Marginal zone B-cell          | Indolent    | C80.0-C85.9 | 9689, 9699, 9760, 9764, 9699 | 4,615  | 5.46     |
| 9     | Not Otherwise Specified       | n/a         | C80.0-C85.9 | 9591, 9675, 9735             | 10,308 | 12.20    |
| 10    | Other***                      | n/a         | C80.0-C85.9 | 9591, 9675, 9735             | 6,019  | 7.12     |
| Total |                               |             |             |                              | 84,504 | 100.00** |

n/a – not applicable; there was no subtype information

\* Chronic lymphocytic leukaemia/Small-cell lymphocytic lymphoma

\*\* Percentages may not equate to 100.0% due to rounding

\*\*\* The morphology code specifies these patients are diagnosed with NHL. However, the description states 'other'; these patients are classified similarly to 'Not Otherwise Specified'.
